# Supplementary material for: Characterization of microRNA-125b expression in MCF7 breast cancer cells by ATR-FTIR spectroscopy
Source: Royal Society of Chemistry journal article supplement (doi:10.1039/c0an00543f), 2010-01-01
Supplement: c0an00543f.pdf [file c0an00543f.pdf]

## Characterization of microRNA-125b expression in MCF7 breast cancer cells by ATR-FTIR Spectroscopy

Nihal SIMSEK OZEK, Serkan TUNA, A. Elif ERSON-BENSAN and Feride SEVERCAN\*

Middle East Technical University, Department of Biological Sciences, 06530, Ankara, Turkey.  
E-mail: feride@metu.edu.tr; Fax: +90 312 210 76 79; Phone: +90 312 210 51 66

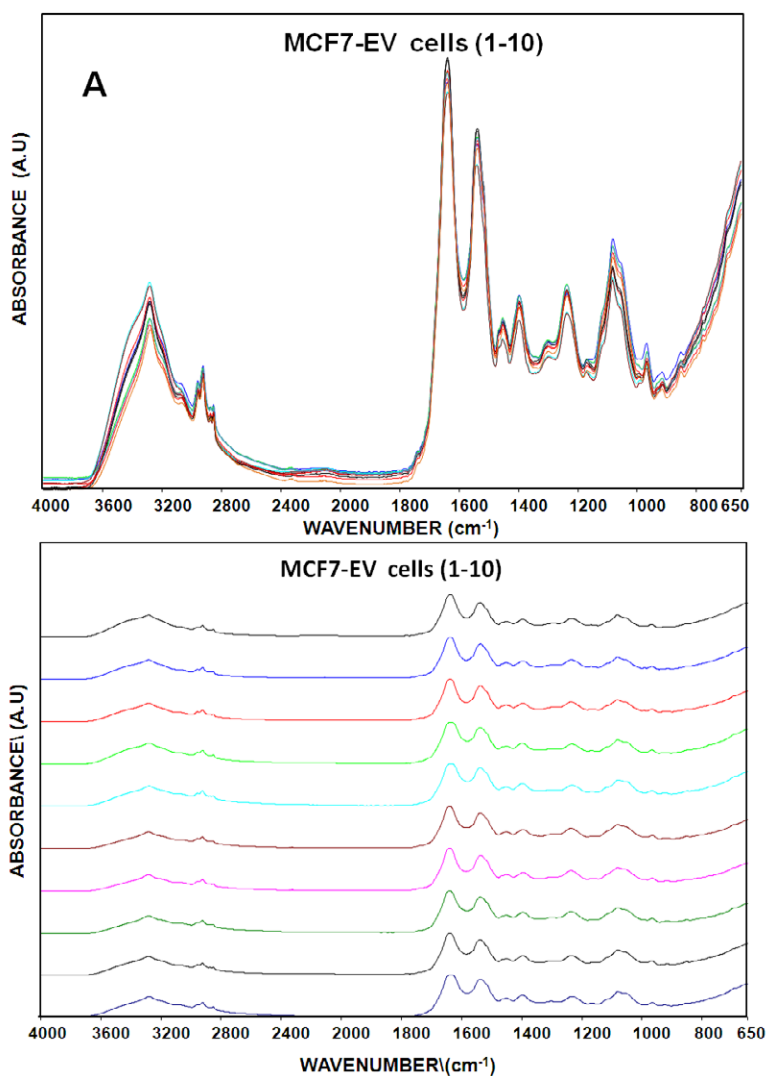

**Fig. S1A** The ten raw spectra of MCF7-EV cells

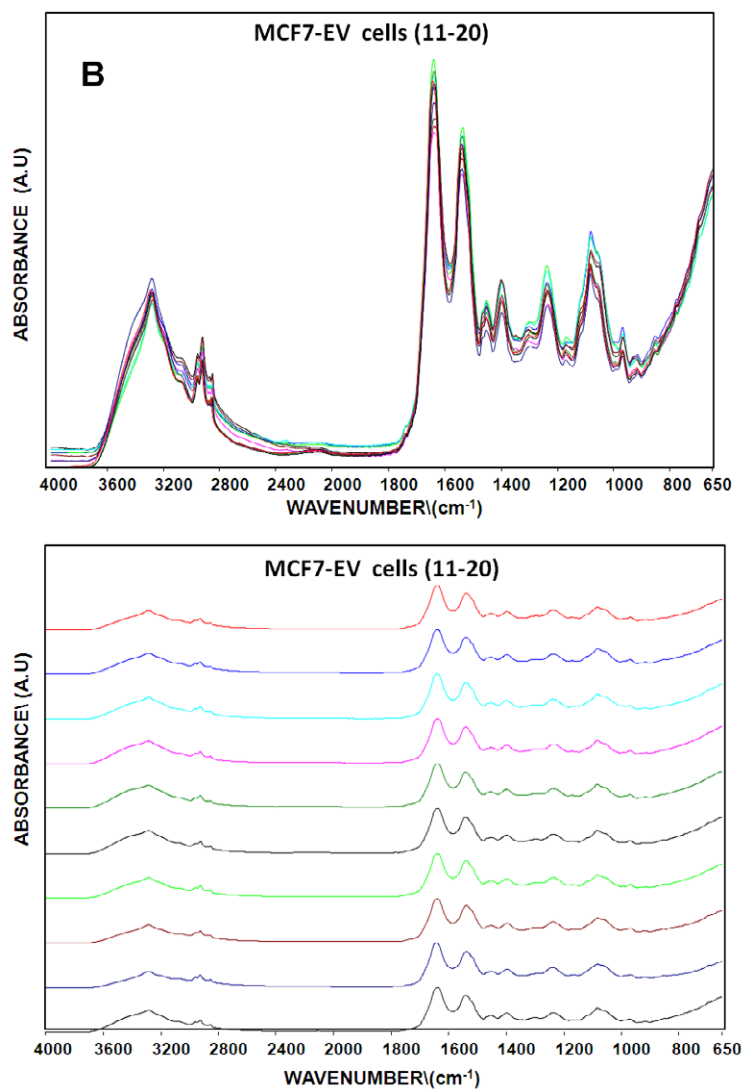

**Fig. S1B** The other ten raw spectra of MCF7-EV cells

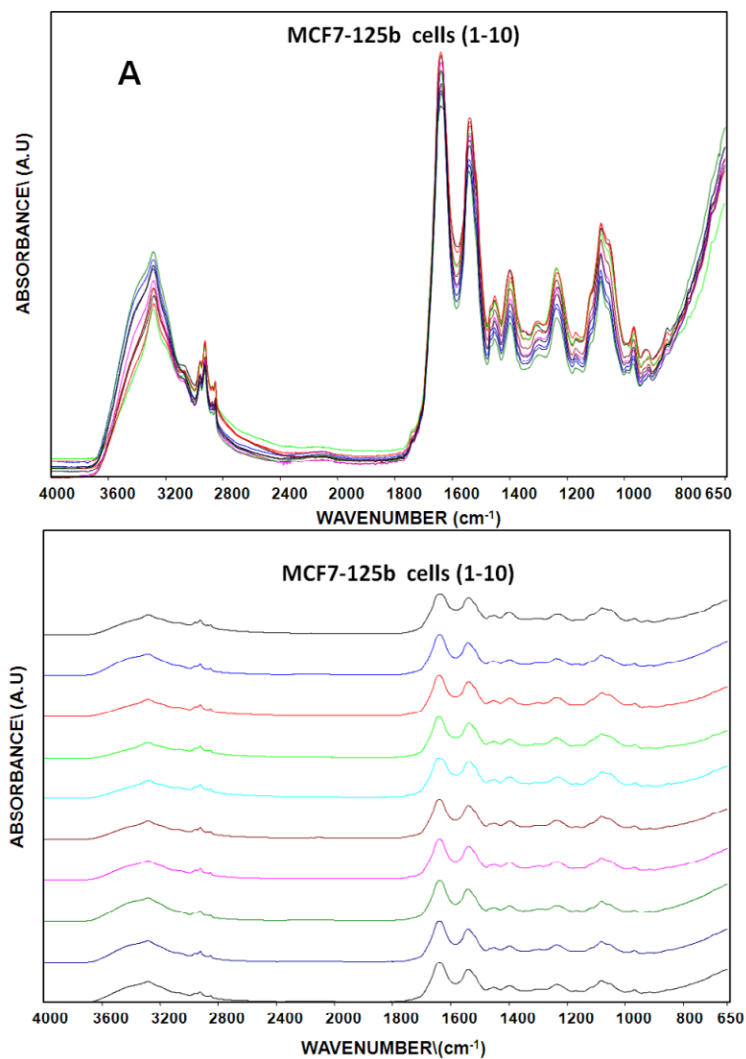

**Fig. S2A** The ten raw spectra of MCF7-125b cells

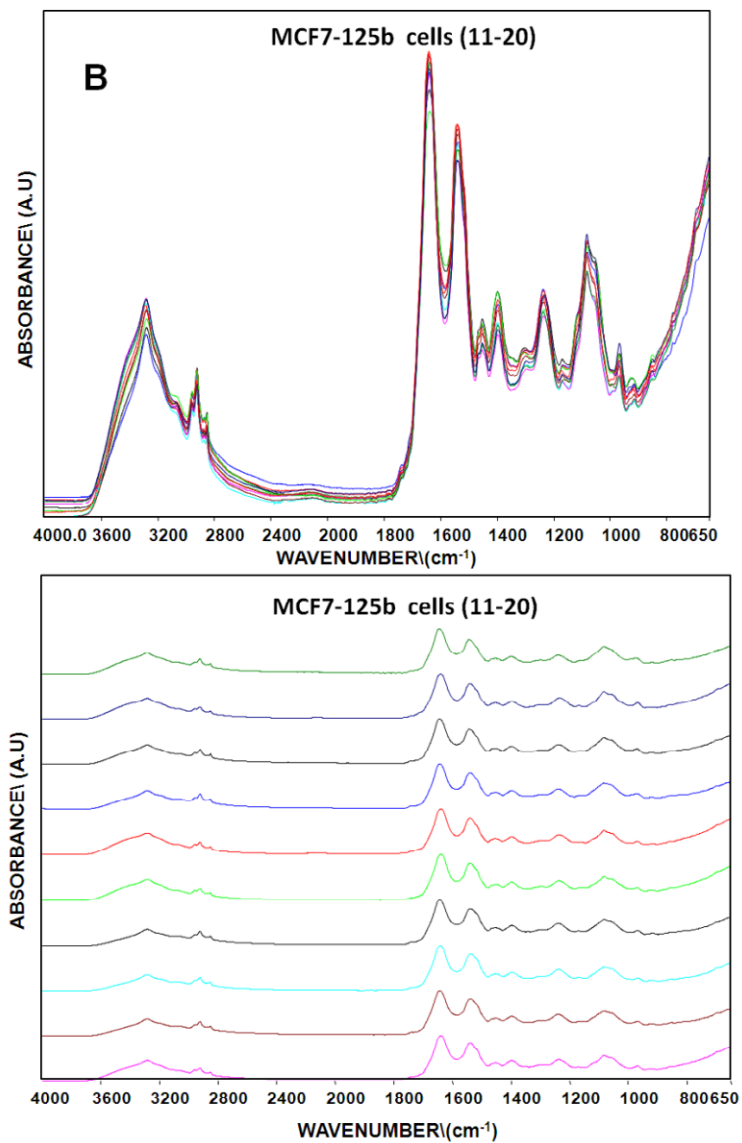

**Fig. S2B** The other ten raw spectra of MCF7-125b cells

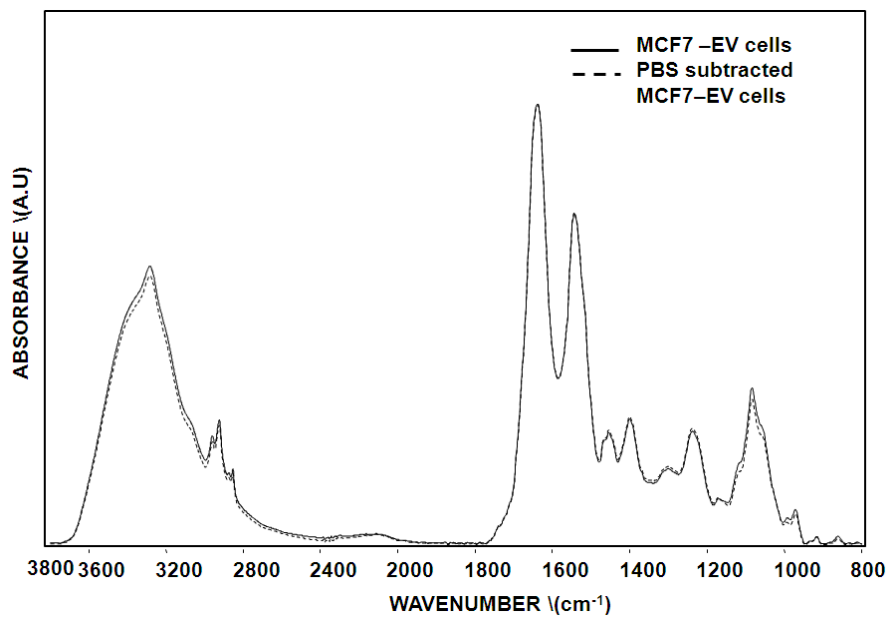

**Fig. S3** Representative FTIR spectra of native and PBS subtracted MCF7-EV cells

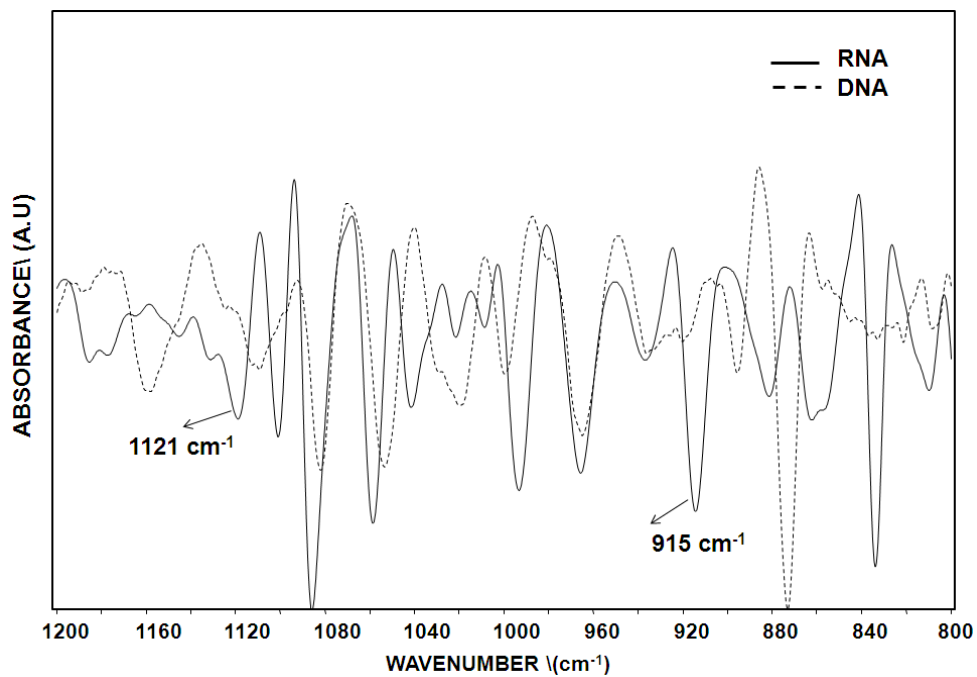

**Fig. S4** IR spectra of RNA and DNA purified from MCF7 cells.
